# Supplementary material for: 13C isotopomics of triacylglycerols using NMR with polarization transfer techniques
Source: Royal Society of Chemistry journal article supplement (doi:10.1039/c5ay01250c), 2015-01-01
Supplement: c5ay01250c1.pdf [file c5ay01250c1.pdf]

## **Electronic supplementary information for *Analytical Methods***

### **<sup>13</sup>C isotopomics of triacylglycerols using NMR with polarization transfer techniques**

Noelle Merchak,<sup>ab</sup> Joseph Bejjani,<sup>\*b</sup> Toufic Rizk,<sup>b</sup> Virginie Silvestre,<sup>a</sup> Gerald S. Remaud<sup>a</sup> and Serge Akoka<sup>a</sup>

<sup>a</sup> EBSI team, Interdisciplinary Chemistry: Synthesis, Analysis, Modelling (CEISAM), University of Nantes-CNRS UMR 6230, 2 rue de la Houssinière, BP 92208, F-44322 Nantes cedex 3, France.

<sup>b</sup> Research Unit: Technologies et Valorisation Alimentaire (TVA), Laboratory of Metrology and Isotopic Fractionation, Faculty of Science, Saint-Joseph University, P.O. Box 11-514 Riad el Solh, Beirut 1107 2050, Lebanon. E-mail: joseph.bejjani@usj.edu.lb

#### **NMR spectrometry experiments**

For quantitative <sup>13</sup>C NMR, oils (403.2 mg) were dissolved in chloroform-d (630.0 mg) and the resulting solutions transferred into 5 mm NMR tubes. For each sample, 6 <sup>13</sup>C INEPT (Insensitive Nuclei Enhanced by Polarization Transfer) spectra were recorded using 11.7 T Bruker Avance-III spectrometer equipped with a 5 mm o.d. dual cryoprobe <sup>13</sup>C/<sup>1</sup>H tuned at the recording frequency of 125.76 MHz for <sup>13</sup>C. The temperature of the probe was set at 293 K. The acquisition parameters for <sup>13</sup>C NMR spectral were as follows: <sup>13</sup>C and <sup>1</sup>H offsets were set at the middle of the frequency range (92.5 ppm for the <sup>13</sup>C and 3 ppm for the <sup>1</sup>H), pulse width 10 μs for the 90° <sup>1</sup>H and 11 μs for the 90° <sup>13</sup>C, 16 scans with a repetition delay of 24 s were recorded in order to have a signal-to-noise ratio higher than 600 on the C2 of glycerol. τ<sub>1</sub> was adjusted to 2.704 ms, and the refocusing period τ<sub>2</sub> was adjusted to 1.409 ms. Adiabatic full passage pulses were generated using Mathcad 8 (MathSoft, Inc.). They were designed with a cosine amplitude modulation of the RF field (ω<sub>1</sub><sup>max</sup> = 157.1 kHz or 93.89 kHz for <sup>13</sup>C or <sup>1</sup>H, respectively) and an offset independent adiabaticity (OIA) by optimizing the frequency sweep ΔF (ΔF = 39 kHz or 17 kHz for <sup>13</sup>C or <sup>1</sup>H, respectively). For inversion pulses, adiabatic full passage pulses were used. For refocusing pulses, composite adiabatic pulses were used. <sup>1</sup>H decoupling was performed using adiabatic full passage RF pulses with cosine square amplitude modulation (ν<sub>2</sub><sup>max</sup> = 17.6 kHz) and offset independent adiabaticity with optimized frequency sweep (ΔF = 14 kHz).

#### **NMR data processing and analysis**

FIDs were zero-filled to 128 K and submitted to an exponential multiplication inducing a line broadening of 1.5 Hz before Fourier transform. The <sup>13</sup>C NMR spectra were manually phased. An automatic polynomial baseline correction (n = 5) was applied to the resulting spectra. The curve fitting was carried out in accordance with a Lorentzian mathematical model using PERCH Software (PERCH NMR Software, University of Kuopio, Finland) and 97 peak areas were obtained for each sample.

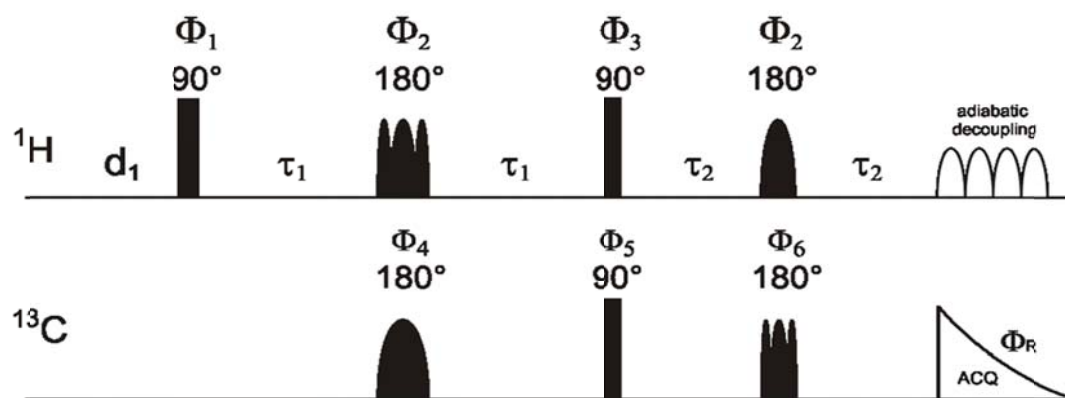

**Fig. S1.** Adiabatic refocused INEPT (Insensitive Nuclei Enhanced by Polarization Transfer) sequence with  $^1\text{H}$  and  $^{13}\text{C}$   $180^\circ$  adiabatic composite refocusing pulses and adiabatic full passage inversion pulses.

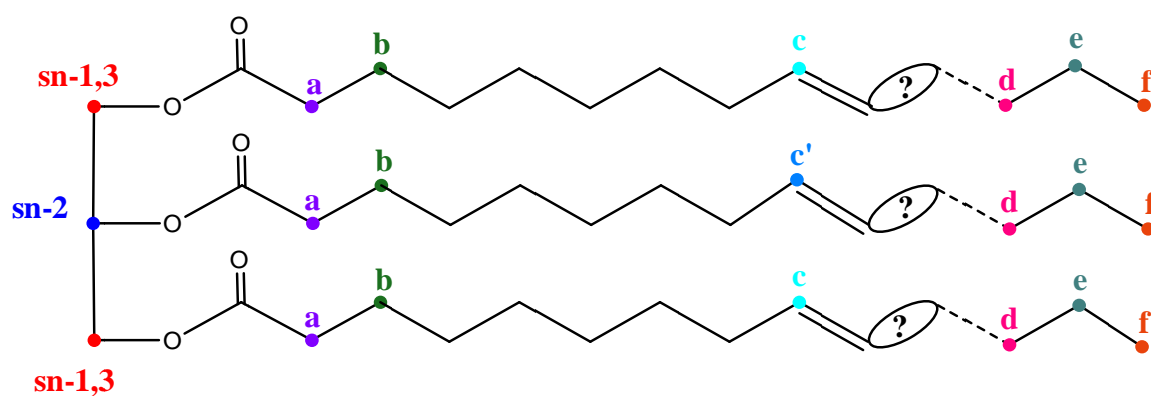

- sn-1,3:** C1,3 of glycerol backbone
- sn-2:** C2 of glycerol backbone
- a:** C2 of fatty acids
- b:** C3 of fatty acids
- c:** C9 of linoleic acid at glycerol sn-1,3
- c':** C9 of linoleic acid at glycerol sn-2
- d:** C $\omega$ 3 of fatty acids
- e:** C $\omega$ 2 of fatty acids
- f:** C $\omega$ 1 of fatty acids

**Fig. S2.** Designation of different carbons in a triacylglycerol molecule

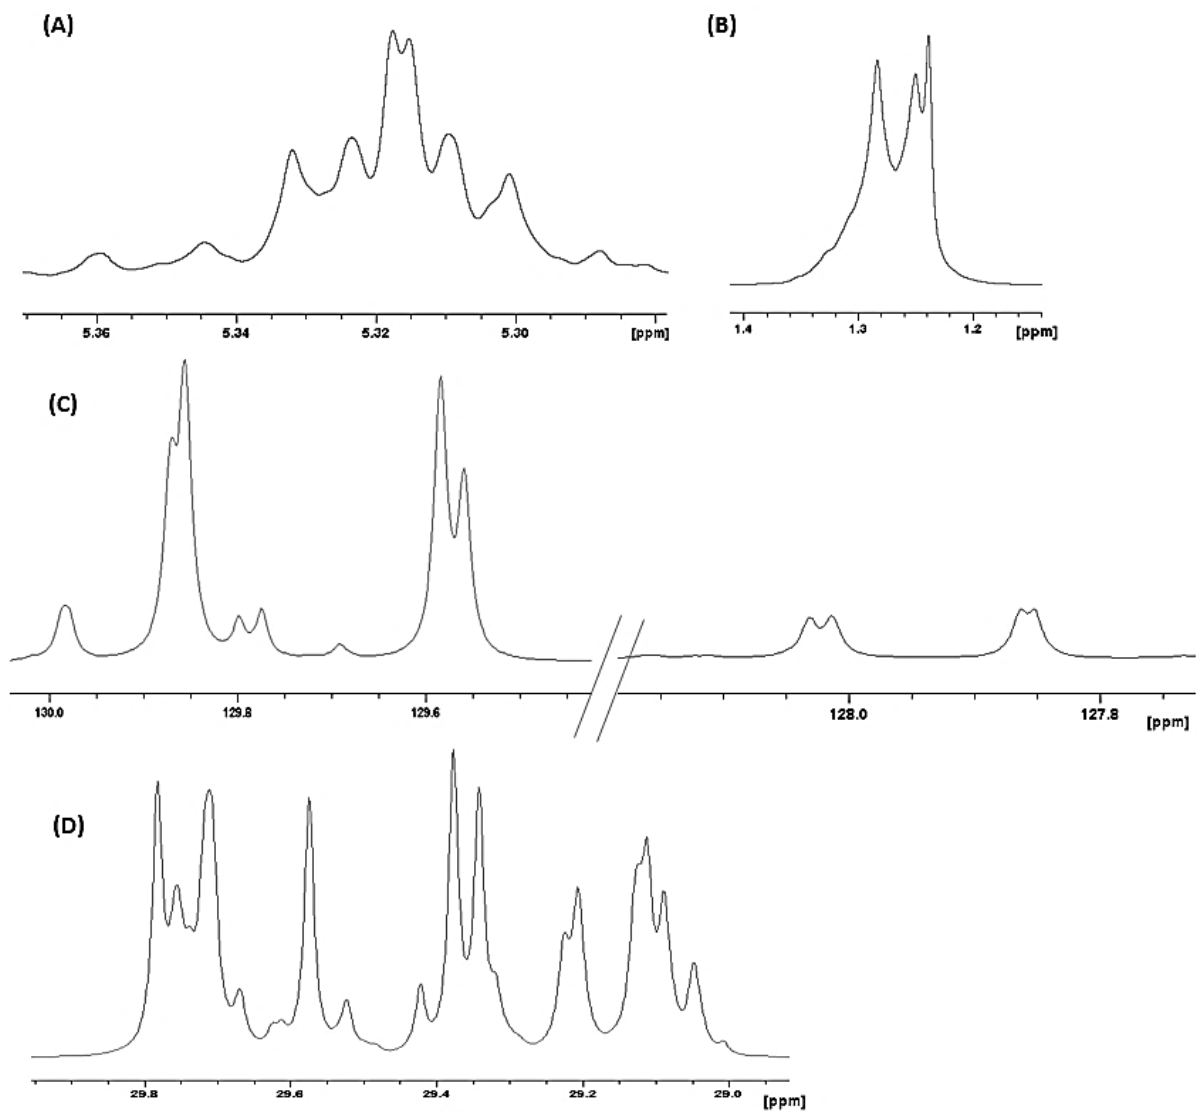

**Fig. S3.** Comparison of different regions of the  $^1\text{H}$  and  $^{13}\text{C}$  NMR spectra of olive oil: olefinic (A) and aliphatic (B) regions of the  $^1\text{H}$  NMR spectrum; olefinic (C) and aliphatic (D) regions of the  $^{13}\text{C}$  NMR spectrum.
